# Supplementary material for: LRP1B suppresses HCC progression through the NCSTN/PI3K/AKT signaling axis and affects doxorubicin resistance
Source: PubMed Central journal article supplement — Genes Dis. 2022 Nov 23;10(5):2082–96. doi: 10.1016/j.gendis.2022.10.021 (PMC10363646; doi:10.1016/j.gendis.2022.10.021), 2022-11-23

武汉普诺赛生命科技有限公司

*Procell Life Science&Technology Co.,Ltd.*

---

## Hep 3B2.1-7 细胞 STR 鉴定报告

### 一、材料处理和检验方法

取适量Hep 3B2.1-7 细胞用 Chelex100提取DNA，采用21CELLID System 扩增20个STR位点和性别鉴定位点，使用ABI3130X1 型遗传分析仪对 STR 位点和性别基因Amelogenin 进行检测，使用GnenMapper idx软件对检测结果进行分析，并与ATCC、DSMZ、JCRB、Cellosaurus等数据库进行比对。

### 二、检测结果

**实验中阴性及阳性对照结果均正确。**

Hep 3B2.1-7 细胞株的 STR 位点和 Amelogenin 位点的基因分型结果见附表，分型图谱见附图。

### 三、分析说明

Hep 3B2.1-7 细胞株基因自 DNA 扩增后图谱清晰，分型结果良好。

### 四、检验结论

1. Hep 3B2.1-7 细胞株 DNA 进行 STR 分型结果显示，细胞株中未发现人类细胞交叉污染。
2. 该细胞株 DNA 分型在细胞库中找到与其细胞分性高度匹配的细胞株，细胞株名称为 Hep 3B2.1-7，匹配度为94%。

---

**销售电话：** 400-650-3656

**企业 QQ：** 4006503656

**销售邮箱：** [sales@procell.com.cn](mailto:sales@procell.com.cn)

**官方网站：** [www.procell.com.cn](http://www.procell.com.cn)

附表 1：细胞株 Hep 3B2.1-7 的 STR 位点和 Amelogenin 位点的基因分型结果

| 细胞 Hep 3B2.1-7 的 STR 位点和 Amelogenin 位点的基因分型结果 |                   |         |         |               |         |         |
|-----------------------------------------------|-------------------|---------|---------|---------------|---------|---------|
| Loci                                          | 送检细胞 STR 信息       |         |         | 细胞库细胞 STR 信息  |         |         |
|                                               | 送检细胞名：Hep 3B2.1-7 |         |         | 细胞库细胞名：HEP-3B |         |         |
|                                               | Allele1           | Allele2 | Allele3 | Allele1       | Allele2 | Allele3 |
| D5S818                                        | 13                | 13      |         | 13            | 13      |         |
| D13S317                                       | 12                | 14      |         | 12            | 14      |         |
| D7S820                                        | 8                 | 10      |         | 8             | 10      |         |
| D16S539                                       | 10                | 10      |         | 10            | 10      |         |
| VWA                                           | 16                | 17      |         | 17            | 17      |         |
| TH01                                          | 6                 | 7       |         | 6             | 7       |         |
| AMEL                                          | X                 | X       |         | X             | X       |         |
| TPOX                                          | 9                 | 9       |         | 9             | 9       |         |
| CSF1PO                                        | 8                 | 8       |         | 8             | 8       |         |
| D12S391                                       | 17                | 17      |         |               |         |         |
| FGA                                           | 18                | 18      |         |               |         |         |
| D2S1338                                       | 21                | 25      |         |               |         |         |
| D21S11                                        | 30                | 31      |         |               |         |         |
| D18S51                                        | 20                | 20      |         |               |         |         |
| D8S1179                                       | 12                | 12      |         |               |         |         |
| D3S1358                                       | 15                | 15      |         |               |         |         |
| D6S1043                                       | 12                | 17      |         |               |         |         |
| PENTAE                                        | 5                 | 16      |         |               |         |         |
| D19S433                                       | 12.2              | 14      |         |               |         |         |
| PENTAD                                        | 12                | 14      |         |               |         |         |

销售电话： 400-650-3656

企业 QQ：4006503656

销售邮箱： [sales@procell.com.cn](mailto:sales@procell.com.cn)

官方网站： [www.procell.com.cn](http://www.procell.com.cn)

武汉普诺赛生命科技有限公司  
Procell Life Science&Technology Co.,Ltd.

附图 2：Hep 3B2.1-7 细胞 STR 位点和 Amelogenin 位点的基因分型结果

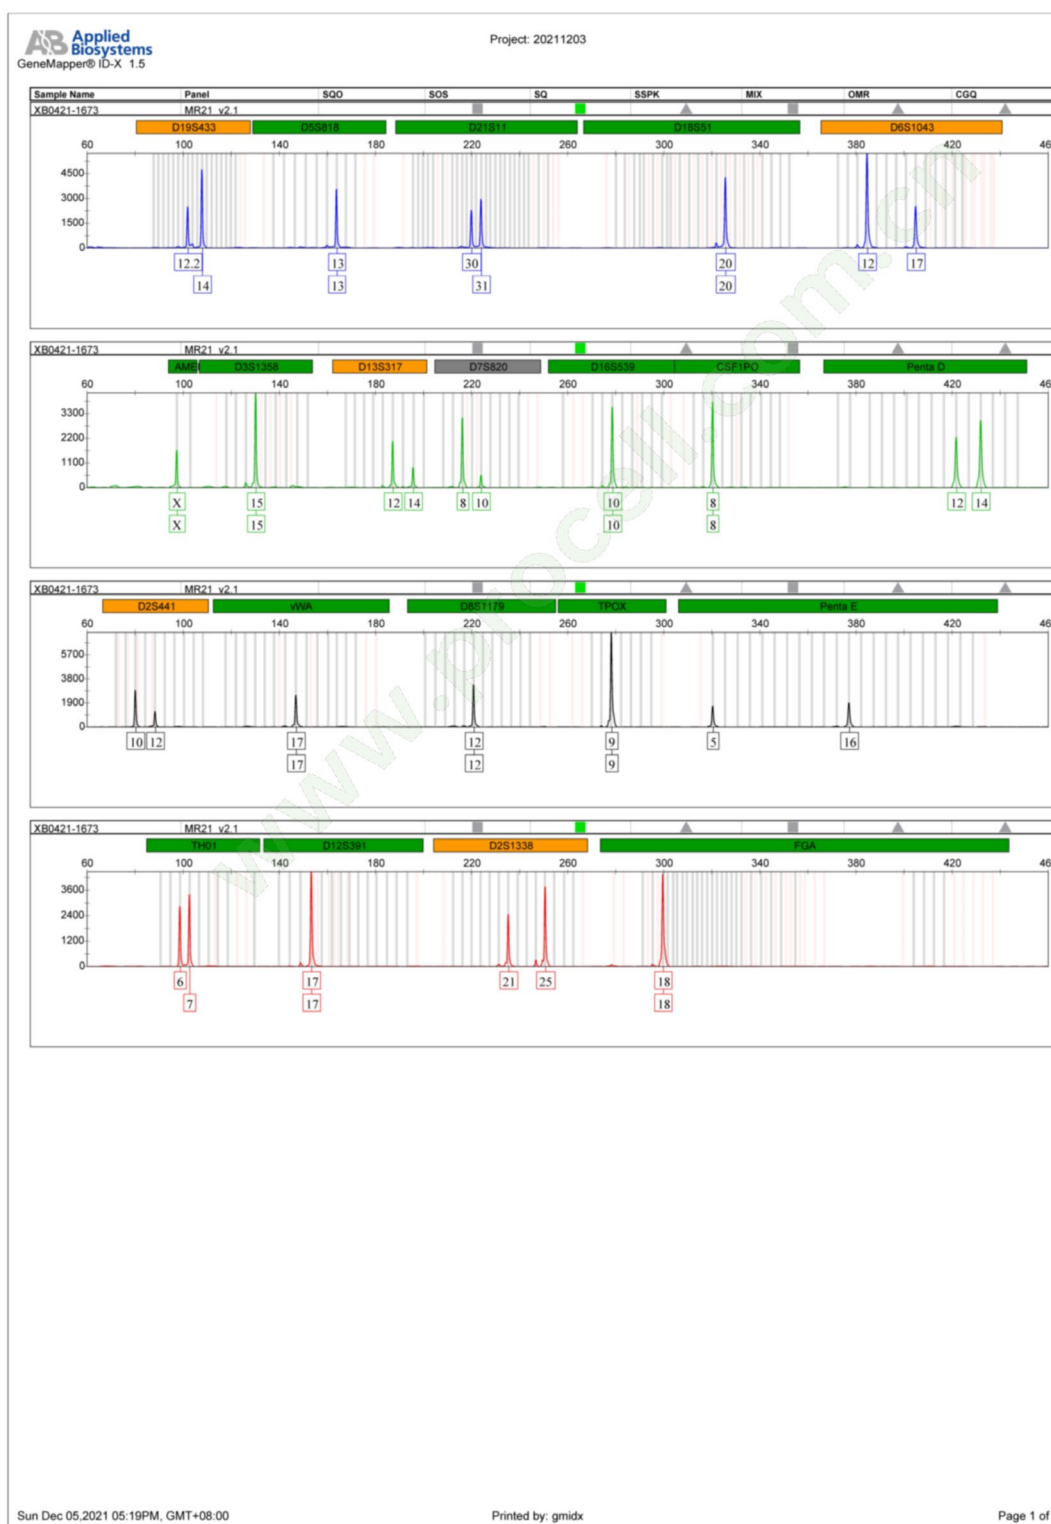

Supplement: mmc2.pdf [file mmc2.pdf]
