# Supplementary material for: LRP1B suppresses HCC progression through the NCSTN/PI3K/AKT signaling axis and affects doxorubicin resistance
Source: PubMed Central journal article supplement — Genes Dis. 2022 Nov 23;10(5):2082–96. doi: 10.1016/j.gendis.2022.10.021 (PMC10363646; doi:10.1016/j.gendis.2022.10.021), 2022-11-23

## HuH-7 细胞 STR 鉴定报告

### 一、 材料处理和检验方法

取适量 **HuH-7** 细胞(编号 XB0421-1791,1×10<sup>6</sup>)使用 Chelex100 提取 DNA, 采用 21 CELLID System 扩增 20 个 STR 位点和性别鉴定位点, 使用 ABI3130x1 型遗传分析仪进行 PCR 产物检测, 使用 GeneMapper IDX 软件(Applied Biosystems)对检测结果进行分析, 并与 ATCC、DSMZ、JCRB、Cellosaurus 等数据库进行比对。

### 二、 检测结果

实验中阴性及阳性对照结果均正确。

**HuH-7** 细胞株的 STR 位点和 Amelogenin 位点的基因分型结果见附表, 分型图谱见附图。

### 三、 分析说明

**HuH-7** 细胞株基因组 DNA 扩增后图谱清晰, 分型结果良好。

### 四、 检验结论

1. **HuH-7** 细胞株 DNA 进行细胞 STR 分型结果显示, 细胞株中未发现人类细胞交叉污染。
2. 该细胞株 DNA 分型在细胞库中找到与其细胞分型 98.25%相匹配的细胞株, 细胞株名称为 **HuH-7**。

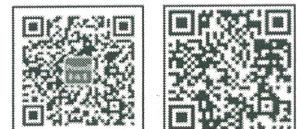

附表 1: 细胞株 **HuH-7** 的 STR 位点和 Amelogenin 位点的基因分型结果

| STR Loci   | 样品名称: XB0421-1791 | 数据库名称: HuH-7 |
|------------|-------------------|--------------|
| Amelogenin | X,X               | X            |
| CSF1PO     | 11,11             | 11           |
| D2S1338    | 19,19             | 19           |
| D3S1358    | 15,15             | 15           |
| D5S818     | 12,12             | 12           |
| D7S820     | 11,11             | 11           |
| D8S1179    | 14,14             | 14,15        |
| D13S317    | 10,11             | 10,11        |
| D16S539    | 10,10             | 10           |
| D18S51     | 15,15             | 15           |
| D19S433    | 13,14             | 13,14        |
| D21S11     | 30,30             | 30           |
| FGA        | 22,23             | 22,23        |
| PentaD     | 12,12             | 12           |
| PentaE     | 11,11             | 11           |
| TH01       | 7,7               | 7            |
| TPOX       | 8,11              | 8,11         |
| vWA        | 16,18             | 16,18        |
| D1S1656    |                   |              |
| D6S1043    | 13,15             | 13,15        |
| D12S391    | 20,21             | 20,21        |
| D2S441     | 12,14             | 12,14        |

CellSaurus 数据库匹配度 98.25%，匹配位点数 20 (<https://web.expasy.org/cellosaurus-str-search/>)

## 备注:

1. 根据国际细胞鉴定委员会(ICLAC)制定的细胞STR鉴定标准,细胞系的匹配度 $\geq 80\%$ 时,认为它们具有相关性,即衍生于共同的祖先细胞;匹配度在55%至80%之间,需要进一步验证相关性;小于55%,表明两者不具有相关性。
2. 图谱有效峰为真实的PCR条带;小峰和非特异性条带在计算中忽略不计。
3. STR数据比对结果默认ExpASY,数据来源包括ATCC,DSMZ,JCRB等细胞库以及文献和资料记载,数据库入口<https://web.expasy.org/cellosaurus-str-search/>。

武汉普诺赛生命科技有限公司  
Procell Life Science&Technology Co.,Ltd.

附图 1: HuH-7 细胞 STR 位点和 Amelogenin 位点的基因分型结果

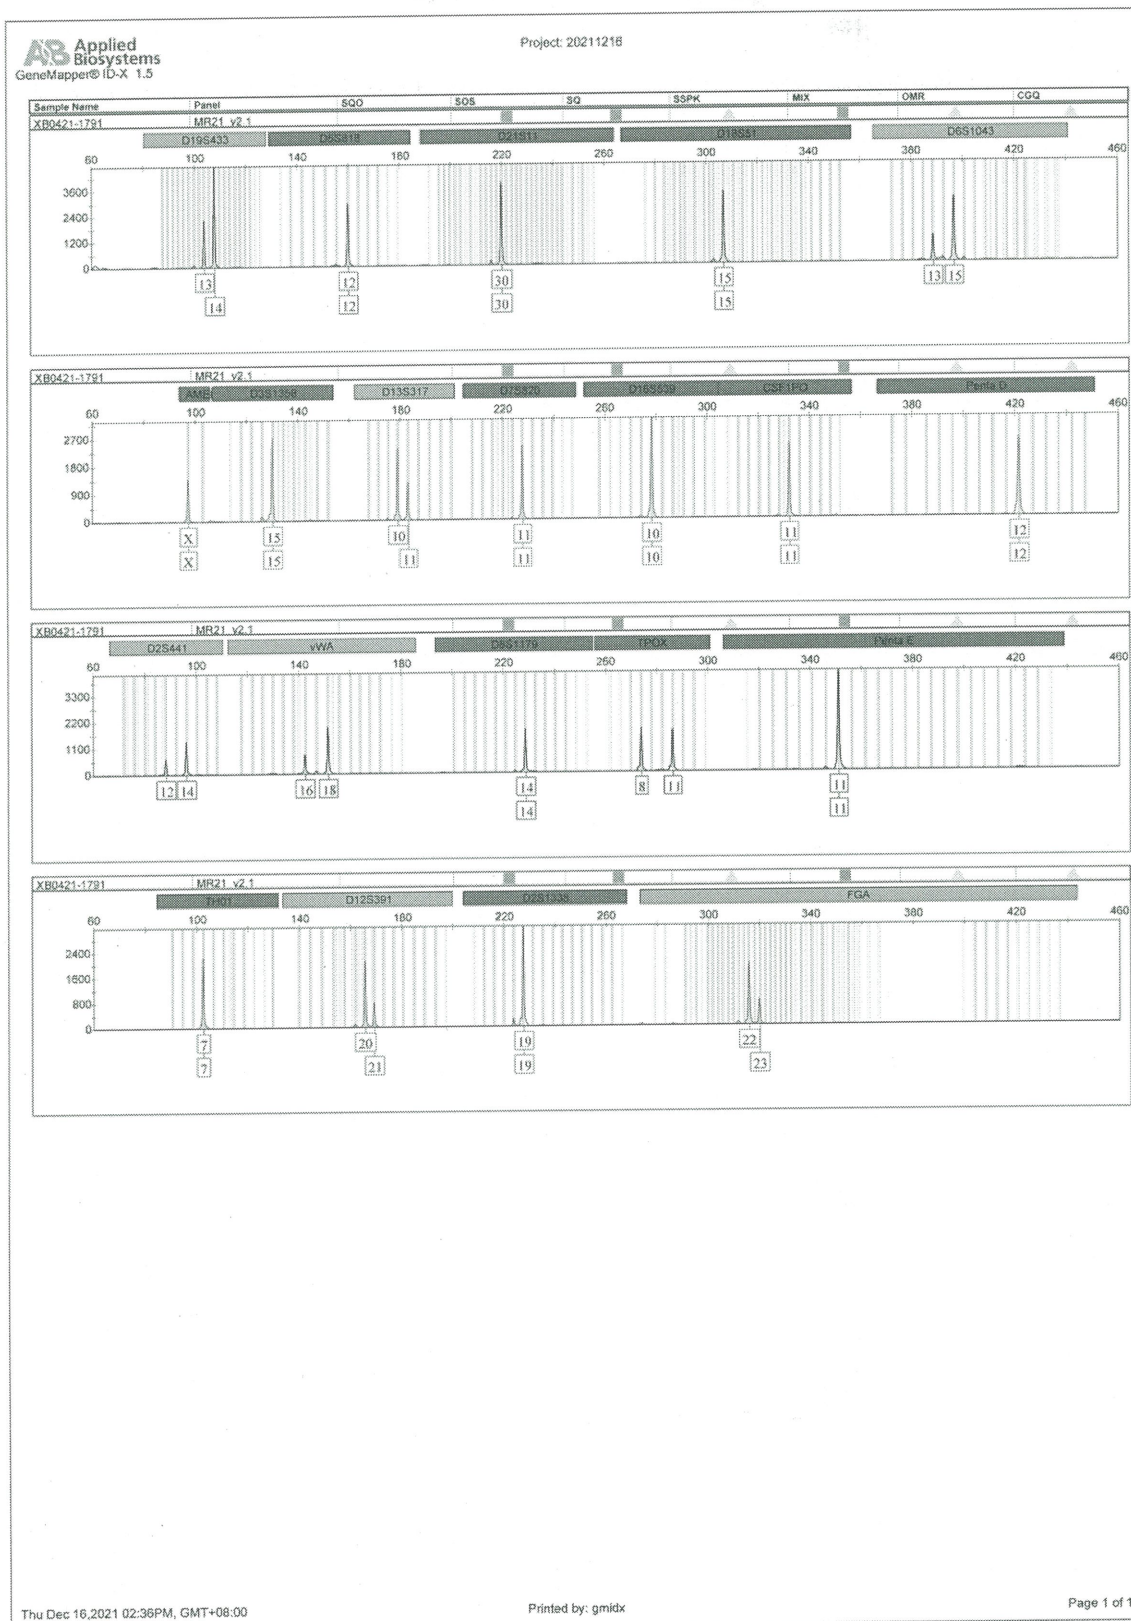

销售电话: 400-650-3656  
 企业 QQ: 4006503656  
 销售邮箱: [sales@procell.com.cn](mailto:sales@procell.com.cn)  
 官方网站: [www.procell.com.cn](http://www.procell.com.cn)

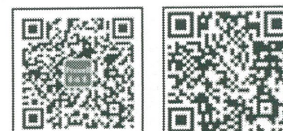

Supplement: mmc3.pdf [file mmc3.pdf]
